# Supplementary material for: Effect of Aerobic Exercise Training on Arterial Stiffness in Obese Populations
Source: Springer Nature journal article supplement (doi:10.1007/s40279-014-0165-y), 2014-02-28
Supplement: MOESM1 [file 40279_2014_165_MOESM1_ESM.docx]

**Electronic Supplementary Material:**

- Table S1. Quality assessment of studies included in the meta-analysis

- Figure S1. MEDLINE search strategy

- References

**Table S1.** Quality assessment of studies included in the meta-analysis [[1](#_ENREF_1)]

| **Scale items** | **Kitzman *et al.* [**[**2**](#_ENREF_2)**], 2013** | **Ho *et al.* [**[**3**](#_ENREF_3)**], 2012** | **McNeilly *et al.* [**[**4**](#_ENREF_4)**], 2012** | **Vinet *et al.* [**[**5**](#_ENREF_5)**], 2011** | **Waib *et al*. [**[**6**](#_ENREF_6)**], 2011** | **Miyaki *et al*. [**[**7**](#_ENREF_7)**], 2003** | **Aizawa *et al*. [**[**8**](#_ENREF_8)**], 2008** | **Hill *et al*. [**[**9**](#_ENREF_9)**], 2007** |
| --- | --- | --- | --- | --- | --- | --- | --- | --- |
| **1. Random allocation** | 1 | 1 | 0 | 0 | 1 | 0 | 0 | 1 |
| **2. Allocation concealed** | 0 | 0 | 0 | 0 | 0 | 0 | 0 | 0 |
| **3. Baseline similarity** | 1 | 1 | 0 | 0 | 1 | 0 | 0 | 1 |
| **4. Subject blinding** | 0 | 0 | 0 | 0 | 0 | 0 | 0 | 0 |
| **5. Therapist blinding** | 0 | 0 | 0 | 0 | 0 | 0 | 0 | 0 |
| **6. Assessor blinding** | 1 | 0 | 0 | 0 | 0 | 0 | 0 | 0 |
| **7. Adequate follow-up** | 1 | 0 | 1 | 1 | 1 | 0 | 1 | 1 |
| **8. ITT analysis** | 1 | 1 | 1 | 1 | 1 | 1 | 1 | 0 |
| **9. Between-group comparisons** | 1 | 1 | 0 | 0 | 1 | 0 | 0 | 1 |
| **10. Point measures & variability** | 1 | 1 | 1 | 1 | 1 | 1 | 1 | 1 |
| **Total** | 7/10 | 5/10 | 3/10 | 3/10 | 6/10 | 2/10 | 3/10 | 5/10 |

1 = yes (scored); 0 = no. ITT, intention-to-treat analysis

**Figure S1.** MEDLINE search strategy

| “obesity” [All Fields]  AND  “arterial stiffness” [All Fields] OR “arterial compliance” [All Fields] OR “arterial distensibility” [All Fields]  AND  “aerobic exercise” [All Fields] OR “physical activity” [All Fields] |
| --- |

REFERENCES

1. Maher CG, Sherrington C, Herbert RD, et al. Reliability of the PEDro scale for rating quality of randomized controlled trials. Phys Ther. 2003 Aug;83(8):713-21.

2. Kitzman DW, Brubaker PH, Herrington DM, et al. Effect of Endurance Exercise Training on Endothelial function and Arterial Stiffness in Older Patients with Heart Failure and Preserved Ejection Fraction: A Randomized, Controlled, Single-Blind Trial. J Am Coll Cardiol. 2013 May 8.

3. Ho SS, Radavelli-Bagatini S, Dhaliwal SS, et al. Resistance, aerobic, and combination training on vascular function in overweight and obese adults. J Clin Hypertens (Greenwich). 2012 Dec;14(12):848-54.

4. McNeilly AM, McClean C, Murphy M, et al. Exercise training and impaired glucose tolerance in obese humans. J Sports Sci. 2012;30(8):725-32.

5. Vinet A, Karpoff L, Walther G, et al. Vascular reactivity at rest and during exercise in middle-aged obese men: effects of short-term, low-intensity, exercise training. Int J Obes. 2011;35(6):820-8.

6. Waib PH, Goncalves MI, Barrile SR. Improvements in insulin sensitivity and muscle blood flow in aerobic-trained overweight-obese hypertensive patients are not associated with ambulatory blood pressure. J Clin Hypertens. 2011;13(2):89-96.

7. Miyaki A, Maeda S, Yoshizawa M, et al. Effect of habitual aerobic exercise on body weight and arterial function in overweight and obese men. Am J Cardiol. 2009;104(6):823-8.

8. Aizawa K, Petrella RJ. Acute and chronic impact of dynamic exercise on arterial stiffness in older hypertensives. Open Cardiovasc Med J. 2008;2:3-8.

9. Hill AM, Buckley JD, Murphy KJ, et al. Combining fish-oil supplements with regular aerobic exercise improves body composition and cardiovascular disease risk factors. Am J Clin Nutr. 2007 May;85(5):1267-74.
